# Supplementary material for: Alkynes as activators in the nickel-catalysed addition of organoboronates to aldehydes
Source: Royal Society of Chemistry journal article supplement (doi:10.1039/b417353h), 2005-01-01
Supplement: b417353h.doc [file b417353h.doc]

# Supporting Information for

**Alkynes as Activators in the Nickel-Catalysed Addition of Organoboronates**

**to Aldehydes**

Go Takahashi, Eiji Shirakawa, Teruhisa Tsuchimoto and Yusuke Kawakami

***General Remarks.*** All manipulations of oxygen- and moisture-sensitive materials were conducted with a standard Schlenk technique under a nitrogen atmosphere. Nuclear magnetic resonance spectra were taken on a Varian Gemini 2000 (1H, 300 MHz; 13C, 75 MHz) or a Varian INOVA 500 (19F, 470 MHz) spectrometer using tetramethylsilane (1H and 13C) or fluorotrichloromethane (19F) as an internal standard. High-resolution mass spectra were obtained with a Bruker Bio APEX 70e spectrometer. Unless otherwise noted, reagents were commercially available and used without further purification. 1,4-Dioxane was distilled from sodium/benzophenone ketyl. Bis(1,5-cyclooctadiene)nickel was purchased from Kanto Chemicals or Strem and recrystallized from toluene/1,5-cyclooctadiene (50:1). Organoboronic acids were purchased from Aldrich Chemical Co. 4-Octyne and 1-phenylpropyne were purchased from Kanto Chemicals and fractionally distilled. Alkynes and 1,4-dioxane were degassed by four freeze-thaw cycles just before use. Aldehydes were purchased from Nacalai tesque or Kanto Chemicals and fractionally distilled.

***Preparation of 2-Substituted 1,3,2-Dioxaborinane. A General Procedure.*** MgSO4 (6.02 g, 50.0 mmol) was added to a solution of an organoboronic acid (10.0 mmol) and 1,3-propanediol (7.70 g, 10.0 mmol) in Et2O (20 mL). After the mixture was stirred at room temperature for 9 h, filtration and evaporation of the solvent followed by fractional distillation, bulb-to-bulb distillation or column chromatography on silica gel (hexane–ethyl acetate) gave the corresponding 2-substituted 1,3,2-dioxaborinane.

Spectral and analytical data follow.

**2-(*p*-Tolyl)-1,3,2-dioxaborinane.** Prepared from *p*-tolylboronic acid (mp 259–260 °C)1 as a white solid (mp 37.6–38.9 °C). Isolated by fractional distillation (bp 75 °C/0.80 mmHg). 1H NMR (300 MHz, CDCl3)  2.05 (quint, *J* = 5.4 Hz, 2 H), 2.35 (s, 3 H), 4.15 (t, *J* = 5.4 Hz, 4 H), 7.14–7.17 (m, 2 H), 7.64–7.67 (m, 2 H).

**2-(4-Methoxyphenyl)-1,3,2-dioxaborinane.** Prepared from 4-methoxyphenylboronic acid (mp 159–164 °C)1 as a white solid (mp 31.1–31.8 °C). Isolated by fractional distillation (bp 90 °C/0.30 mmHg). 1H NMR (300 MHz, CDCl3)  2.04 (quint, *J* = 5.4 Hz, 2 H), 3.82 (s, 3 H), 4.15 (t, *J* = 5.4 Hz, 4 H), 6.85–6.90 (m, 2 H), 7.68–7.73 (m, 2 H).

**2-[4-(Trifluoromethyl)phenyl]-1,3,2-dioxaborinane.** Prepared from 4-(trifluoromethyl)phenylboronic acid (mp 230–235 °C)2 as a white solid (mp 77.1–79.6 °C). Isolated by column chromatography on silica gel (hexane : ethyl acetate = 1 : 1). 1H NMR (300 MHz, CDCl3)  2.08 (quint, *J* = 5.4 Hz, 2 H), 4.18 (t, *J* = 5.4 Hz, 4 H), 7.56–7.60 (m, 2 H), 7.85–7.88 (m, 2 H).

**2-(4-Acetylphenyl)-1,3,2-dioxaborinane.** Prepared from 4-acetylphenylboronic acid (mp 240–244 °C)3 as a white solid (mp 76.5–78.4 °C). Isolated by bulb-to-bulb distillation (bp 115 °C/0.10 mmHg). 1H NMR (300 MHz, CDCl3)  2.08 (quint, *J* = 5.4 Hz, 2 H), 2.61 (s, 3 H), 4.18 (t, *J* = 5.4 Hz, 4 H), 7.83–7.86 (m, 2 H), 7.90–7.93 (m, 2 H).

**2-[3-(Hydroxymethyl)phenyl]-1,3,2-dioxaborinane.** Prepared from 3-(Hydroxymethyl)phenylboronic acid (mp 95–99 °C)3 as a colorless oil. Isolated by bulb-to-bulb distillation (bp 180 °C/0.20 mmHg). 1H NMR (300 MHz, CDCl3)  2.05 (quint, *J* = 5.4 Hz, 2 H), 4.16 (t, *J* = 5.4 Hz, 4 H), 4.67 (s, 2 H), 7.32–7.37 (m, 1 H), 7.41–7.46 (m, 1 H), 7.67–7.72 (m, 1 H), 7.75 (s, 1 H).

**2-[(*E*)-Styryl]-1,3,2-dioxaborinane.** Prepared from (*E*)-styrylboronic acid (mp 145–150 °C)3 as a colorless oil. Isolated by bulb-to-bulb distillation (bp 120 °C/1.0 mmHg). 1H NMR (300 MHz, CDCl3) 2.02 (quint, *J* = 5.4 Hz, 2 H), 4.10 (t, *J* = 5.4 Hz, 4 H), 6.07 (d, *J* = 18.0 Hz, 1 H), 7.23–7.37 (m, 4 H), 7.44–7.51 (m, 2 H).

***Nickel-Catalysed Addition of Organoboronates to Aldehydes. A General Procedure.*** Water (5.4 mg, 0.30 mmol) was added to a solution of an organoboronate (0.30 mmol), an aldehyde (0.36 mmol), an alkyne (60 mol) and Ni(cod)2 (4.1 mg, 15 mol) in 1,4-dioxane (0.45 mL). After the mixture was stirred at 80 °C for 2 or 12 h, the resulting mixture was treated with a saturated NH4Cl aqueous solution (10 mL) and extracted with diethyl ether (15 mL x 3). The combined organic layer was washed with a saturated NaHCO3 aqueous solution (10 mL) and brine (10 mL), and then dried over anhydrous sodium sulfate. Filtration and evaporation of the solvent followed by bulb-to-bulb distillation or column chromatography on silica gel (hexane–ethyl acetate) gave the corresponding alcohol. The results are summarized in Table 2.

Spectral and analytical data of the new compounds follow.

**1-(*p*-Tolyl)hexan-1-ol.** A colorless oil.Isolated by column chromatography on silica gel (hexane : ethyl acetate = 15 : 1) or bulb-to-bulb distillation (bp 120 °C/1.2 mmHg). 1H NMR (300 MHz, CDCl3)  0.82–0.92 (m, 3 H), 1.20–1.48 (m, 6 H), 1.62–1.86 (m, 3 H), 2.34 (s, 3 H), 4.62 (t, *J* = 6.9 Hz, 1 H), 7.13–7.17 (m, 2 H), 7.22–7.25 (m, 2 H);13C NMR (75 MHz, CDCl3)  13.8, 20.9, 22.4, 25.4, 31.6, 38.8, 74.4, 125.8, 129.1, 137.1, 142.0. HRMS (EI) Calcd for C13H20O: M+, 192.1513. Found: *m*/*z* 192.1501.

**1-(4-Methoxyphenyl)hexan-1-ol.** A colorless oil. Isolated by column chromatography on silica gel (hexane : ethyl acetate = 4 : 1).1H NMR (300 MHz, CDCl3)  0.82–0.94 (m, 3 H), 1.16–1.46 (m, 6 H), 1.61–1.87 (m, 3 H), 3.80 (s, 3 H), 4.60 (t, *J* = 6.9 Hz, 1 H), 6.85–6.91 (m, 2 H), 7.23–7.29 (m, 2 H); 13C NMR (75 MHz, CDCl3)  13.8, 22.4, 25.4, 31.5, 38.8, 55.1, 74.2, 113.7, 127.1, 137.1, 159.0. HRMS (EI) Calcd for C13H20O2: M+, 208.1462. Found: *m*/*z* 208.1459.

**1-[4-(Trifluoromethyl)phenyl]hexan-1-ol.** A colorless oil. Isolated by column chromatography on silica gel (hexane : ethyl acetate = 15 : 1).1H NMR (300 MHz, CDCl3)  0.83–0.94 (m, 3 H), 1.22–1.49 (m, 6 H), 1.63–1.84 (m, 2 H), 2.00 (brs, 1 H), 4.74 (t, *J* = 6.6 Hz, 1 H), 7.42–7.48 (m, 2 H), 7.56–7.62 (m, 2 H);13C NMR (75 MHz, CDCl3)  13.6, 22.2, 24.9, 31.3, 38.9, 73.7, 125.1 (q, 3*J*C–F = 3.4 Hz), 125.9, 126.5 (q, 1*J*C–F = 271.2 Hz), 129.4 (q, 2*J*C–F = 33.0 Hz), 148.7; 19F NMR (470 MHz, CDCl3)  –63.0. HRMS (EI) Calcd for C13H17F3O: M+, 246.1231. Found: *m*/*z* 246.1214.

**1-(4-Acetylphenyl)hexan-1-ol.** A colorless oil.Isolated by column chromatography on silica gel (hexane : ethyl acetate = 4 : 1). 1H NMR (300 MHz, CDCl3)  0.82–0.94 (m, 3 H), 1.24–1.50 (m, 6 H), 1.60–1.86 (m, 2 H), 2.01 (brs, 1 H), 2.60 (s, 3 H), 4.75 (t, *J* = 6.6 Hz, 1 H), 7.42–7.46 (m, 2 H), 7.92–7.96 (m, 2 H);13C NMR (75 MHz, CDCl3)  13.8, 22.3, 25.1, 26.4, 31.5, 39.0, 74.0, 126.0, 128.5, 136.3, 150.3, 198.0. HRMS (EI) Calcd for C14H20O2: M+, 220.1462. Found: *m*/*z* 220.1456.

**1-[3-(Hydroxymethyl)phenyl]hexan-1-ol.** A colorless oil.Isolated by column chromatography on silica gel (hexane : ethyl acetate = 1 : 1). 1H NMR (300 MHz, CDCl3)  0.82–0.92 (m, 3 H), 1.21–1.48 (m, 6 H), 1.62–1.86 (m, 2 H), 1.88–2.10 (m, 2 H), 4.62–4.73 (m, 1 H), 4.67 (brs, 2 H), 7.23–7.28 (m, 2 H), 7.30–7.37 (m, 2 H);13C NMR (75 MHz, CDCl3)  13.8, 22.3, 25.3, 31.5, 38.9, 65.1, 74.5, 124.4, 125.2, 126.1, 128.6, 141.1, 145.3. HRMS (EI) Calcd for C13H20O2: M++, 208.1462. Found: *m*/*z* 208.1459.

**(*Z*)-1-Phenyl-2-propyl-3-(*p*-tolyl)-hex-2-en-1-ol (4).** A colorless oil. Isolated by column chromatography on silica gel (hexane : ethyl acetate = 6 : 1).1H NMR (300 MHz, CDCl3)  0.80 (t, *J* = 7.2 Hz, 3 H), 0.88 (t, *J* = 7.2 Hz, 3 H), 1.19–1.48 (m, 5 H), 1.93 (ddd, *J* = 13.8, 11.7, 5.1 Hz, 1 H), 2.11 (ddd, *J* = 13.5, 11.7, 4.8 Hz, 1 H), 2.30–2.37 (m, 2 H), 2.34 (s, 3 H), 5.36 (s, 1 H), 7.06–7.10 (m, 2 H), 7.12–7.30 (m, 7 H);13C NMR (75 MHz, CDCl3)  13.9, 14.6, 20.9, 24.1, 29.5, 29.6, 36.4, 73.7, 125.7, 126.6, 127.9, 128.5, 128.9, 136.0, 137.1, 139.4, 141.1, 143.1. HRMS (EI) Calcd for C22H28O: M+, 308.2139. Found: *m*/*z* 308.2127.

The other products have already been reported and their spectral and analytical data are in excellent agreement with those.

**Phenyl(*p*-tolyl)methanol.**4,5A colorless oil. Isolated by column chromatography on silica gel (hexane : ethyl acetate = 6 : 1). 1H NMR (300 MHz, CDCl3)  2.24 (s, 1 H), 2.32 (s, 3 H), 5.79 (s, 1 H), 7.11–7.16 (m, 2 H), 7.22–7.27 (m, 2 H), 7.29–7.38 (m, 5 H).

**4-Methoxyphenyl(*p*-tolyl)methanol.**6A colorless oil. Isolated by column chromatography on silica gel (hexane : ethyl acetate = 5 : 1). 1H NMR (300 MHz, CDCl3)  2.17 (s, 1 H), 2.33 (s, 3 H), 3.78 (s, 3 H), 5.77 (s, 1 H), 6.82–6.87 (m, 2 H), 7.11–7.16 (m, 2 H), 7.23–7.29 (m, 4 H).

***p*-Tolyl[4-(trifluoromethyl)phenyl]methanol.**5A colorless oil. Isolated by column chromatography on silica gel (hexane : ethyl acetate = 9 : 1). 1H NMR (300 MHz, CDCl3)  2.23 (d, *J* = 3.3 Hz, 1 H), 2.33 (s, 3 H), 5.86 (d, *J* = 3.3 Hz, 1 H), 7.14–7.18 (m, 2 H), 7.22–7.26 (m, 2 H), 7.48–7.54 (m, 2 H), 7.56–7.62 (m, 2 H).

**(4-Methoxyphenyl)(phenyl)methanol.**4A colorless oil. Isolated by column chromatography on silica gel (hexane : ethyl acetate = 4 : 1). 1H NMR (300 MHz, CDCl3)  2.20 (d, *J* = 3.3 Hz, 1 H), 3.79 (s, 3 H), 5.80 (d, *J* = 3.3 Hz, 1 H), 6.84–6.89 (m, 2 H), 7.22–7.40 (m, 7 H).

**Phenyl[4-(trifluoromethyl)phenyl]methanol.**4A colorless oil. Isolated by column chromatography on silica gel (hexane : ethyl acetate = 9 : 1). 1H NMR (300 MHz, CDCl3)  2.39 (s, 1 H), 5.88 (s, 1 H), 7.26–7.37 (m, 5 H), 7.49–7.54 (m, 2 H), 7.57–7.62 (m, 2 H).

**(4-Acetylphenyl)(phenyl)methanol.**4A colorless oil. Isolated by column chromatography on silica gel (hexane : ethyl acetate = 2 : 1). 1H NMR (300 MHz, CDCl3)  2.49 (d, *J* = 3.3 Hz, 1 H), 2.57 (s, 3 H), 5.88 (d, *J* = 3.3 Hz, 1 H), 7.26–7.38 (m, 5 H), 7.47–7.52 (m, 2 H), 7.89–7.94 (m, 2 H).

**[3-(Hydroxymethyl)phenyl](phenyl)methanol.**7A colorless oil. Isolated by column chromatography on silica gel (hexane : ethyl acetate = 1 : 1). 1H NMR (300 MHz, CDCl3)  1.89 (brs, 1 H), 2.47 (brs, 1 H), 4.63 (s, 2 H), 5.82 (s, 1 H), 7.23­­–7.39 (m, 9 H).

**(*E*)-1,3-Diphenyl-2-propen-1-ol.**4A colorless oil. Isolated by column chromatography on silica gel (hexane : ethyl acetate = 7 : 1). 1H NMR (300 MHz, CDCl3)  2.10 (d, *J* = 3.3 Hz, 1 H), 5.40 (dd, *J* = 6.3, 3.3 Hz, 1 H), 6.39 (dd, *J* = 15.9, 6.3 Hz, 1 H), 6.70 (d, *J* = 15.9 Hz, 1 H), 7.25– 7.47 (m, 10 H).

**(*E*)-4-(*p*-Tolyl)-4-octene (5).**8 A colorless oil. Isolated by column chromatography on silica gel (hexane).1H NMR (300 MHz, CDCl3)  0.87 (t, *J* = 7.5 Hz, 3 H), 0.95 (t, *J* = 7.5 Hz, 3 H), 1.20–1.61 (m, 4 H), 2.16 (q, *J* = 7.2 Hz, 2 H), 2.33 (s, 3 H), 2.45 (t, *J* = 7.2 Hz, 2 H), 5.63 (t, *J* = 7.2 Hz, 1 H), 7.08–7.12 (m, 2 H), 7.21–7.25 (m, 2 H).

***Nickel-Catalysed Addition of 2-(p-Tolyl)-1,3,2-dioxaborinane to Benzaldehyde in Water.*** To Ni(cod)2 (8.5 mg, 31 mol) was added successively water (0.93 mL: degassed by ten evacuation-refill cycles just before use), 4-octyne (13.6 mg, 0.123 mmol), benzaldehyde (64.8 mg, 0.611 mmol) and 2-(*p*-tolyl)-1,3,2-dioxaborinane (163 mg, 0.927 mmol). After the mixture was stirred at 40 °C for 2 h, diethyl ether (30 mL) and a saturated NH4Cl aqueous solution (10 mL) was added to the resulting mixture and extracted with diethyl ether (15 mL x 2). The combined organic layer was washed with a saturated NaHCO3 aqueous solution (10 mL) and brine (10 mL), and then dried over anhydrous sodium sulfate. Filtration and evaporation of the solvent followed by column chromatography on silica gel (hexane–ethyl acetate) gave 118 mg (97%) of phenyl(*p*-tolyl)methanol as a colorless oil.

***Nickel-Catalysed Addition of Organoboronates to Glutaraldehyde. A General Procedure.*** A solution (0.49 M in H2O) of glutaraldehyde (70 L, 0.36 mmol) was added to a solution of an organoboronate (0.30 mmol), an alkyne (60 mol) and Ni(cod)2 (4.1 mg, 15 mol) in 1,4-dioxane (0.45 mL). After the mixture was stirred at 80 °C for 2 or 12 h, the resulting mixture was treated with a saturated NH4Cl aqueous solution (10 mL) and extracted with diethyl ether (15 mL x 3). The combined organic layer was washed with a saturated NaHCO3 aqueous solution (10 mL) and brine (10 mL), and then dried over anhydrous sodium sulfate. Filtration and evaporation of the solvent followed by column chromatography on silica gel (hexane–ethyl acetate) gave the corresponding lactol.

**2-(*p*-Tolyl)--valerolactol (7a).** A colorless oil. Isolated by column chromatography on silica gel (hexane : ethyl acetate = 4 : 1).1H NMR (300 MHz, CDCl3)  1.35–2.11 (m, 6 H), 2.33 (s, 3 H), 2.68–2.72 (m) and 3.12 (d, *J* = 5.7 Hz)/1 H, 4.45 (dd, *J* = 11.1, 2.1 Hz) and 4.98 (dd, *J* = 11.7, 2.1 Hz)/1 H, 4.87 (ddd, *J* = 9.3, 5.7, 2.1 Hz) and 5.42–5.46 (m)/1 H, 7.12–7.18 (m, 2 H), 7.22–7.29 (m, 2 H). Diastereometric ratio was determined by comparison of the integrated 1H NMR peak areas between 4.45 ppm and 4.98 ppm.

**2-[(*E*)-Styryl]--valerolactol (7b).** A colorless oil. Isolated by column chromatography on silica gel (hexane : ethyl acetate = 4 : 1).1H NMR (300 MHz, CDCl3)  1.24–2.08 (m, 6 H), 2.67–2.72 (m, 0.45 H)/3.13 (d, *J* = 6.0 Hz, 0.55 H), 4.11–4.19 (m, 0.55 H)/4.61–4.70 (m, 0.45 H), 4.80–4.87 (ddd, *J* = 9.6, 6.0, 1.5 Hz, 0.45 H)/5.38–5.43 (m, 0.55 H), 6.20 (dd, *J* = 15.9, 6.3 Hz, 0.45 H)/6.24 (dd, *J* = 15.9, 6.0 Hz, 0.55 H), 6.60 (dd, *J* = 15.9, 0.9 Hz, 0.45 H)/6.62 (dd, *J* = 15.9, 0.9 Hz, 0.55 H), 7.19–7.41 (m, 5 H).

***Oxidation of Lactols. A General Procedure.***9A solution of a lactol (0.20 mmol) in dichloromethane (1.0 mL) was added to a solution of pyridinium dichromate (113 mg, 0.300 mmol) and sodium acetate (9.8 mg, 0.12 mmol) in dichloromethane (1.0 mL). After the mixture was stirred at room temperature for 12 h, the mixture was diluted with diethyl ether and filtrated through a pad of Florisil. Evaporation of the solvent followed by column chromatography on silica gel (hexane–ethyl acetate) gave the corresponding lactone.

**2-(*p*-Tolyl)--valerolactone (8a).** A white solid. Isolated by column chromatography on silica gel (hexane : ethyl acetate = 2 : 1).1H NMR (300 MHz, CDCl3)  1.79–2.11 (m, 3 H), 2.10–2.18 (m, 1 H), 2.35 (s, 3 H), 2.56 (dt, *J* = 16.7, 7.6 Hz, 1 H), 2.65–2.76 (m, 1 H), 5.33 (dd, *J* = 9.9, 3.3 Hz, 1 H), 7.16–7.26 (m, 4 H);13C NMR (75 MHz, CDCl3)  18.4, 20.9, 29.3, 30.3, 81.5, 125.6, 129.2, 136.8, 138.4, 171.5. HRMS (EI) Calcd for C12H14O2: M+, 190.0993. Found: *m*/*z* 190.0990.

**2-[(*E*)-Styryl]--valerolactone (8b).** A colorless oil. Isolated by column chromatography on silica gel (hexane : ethyl acetate = 3 : 1).1H NMR (300 MHz, CDCl3)  1.69–1.83 (m, 1 H), 1.84–2.13 (m, 3 H), 2.47–2.71 (m, 2 H), 5.00 (dddd, *J* = 9.6, 6.0, 3.6, 1.2 Hz, 1 H), 6.21 (dd, *J* = 15.9, 6.3, 1 H), 6.68 (dd, *J* = 15.9, 1.2 Hz, 1 H), 7.24–7.40 (m, 5 H);13C NMR (75 MHz, CDCl3)  18.1, 28.3, 29.4, 80.2, 126.6, 127.0, 128.1, 128.6, 132.1, 136.0, 171.3. HRMS (EI) Calcd for C13H14O2: M+, 202.0993. Found: *m*/*z* 202.0983.

**References**

1. D. G. Lloyd, R. B. Hughes, D. M. Zisterer, D. C. Williams, C. Fattorusso, B. Catalanotti, G. Campiani and M. J. Meegan, *J. Med. Chem.*, 2004, **47**, 5612–5615.
2. J. Morgan and J. T. Pinhey, *J. Chem. Soc., Perkin Trans. 1*, 1990, 715–720.
3. Handbook of Fine Chemicals and Laboratory Equipment, 2003–2004, Aldrich Co.
4. M. Ueda and N. Miyaura, *J. Org. Chem.,* 2000, **65**, 4450–4452.
5. C. Pourbaix, F. Carreaux and B. Carboni, *Org. Lett.,* 2001, **3**, 803–805.
6. T. V. Pham and R. A. McClelland, *Can. J. Chem.,* 2001, **79**, 1887–1897.
7. C. Gomez, F. F. Huerta and M. Yus, *Tetrahedron,* 1998, **54**, 1853–1866.
8. J. G. Duboudin and B. Jousseaume, *J. Organomet. Chem.,* 1978, **162**, 209–222.
9. E. J. Corey and J. W. Suggs, *Tetrahedron Lett.*, 1975, **16**, 2647–2650.
